# Supplementary material for: Immunization with the immunodominant Helicobacter suis urease subunit B induces partial protection against H. suis infection in a mouse model
Source: PubMed Central journal article supplement (PMC3542004; doi:10.1186/1297-9716-43-72), 2012-10-26

M<sub>w</sub>  
(kDa) → pH

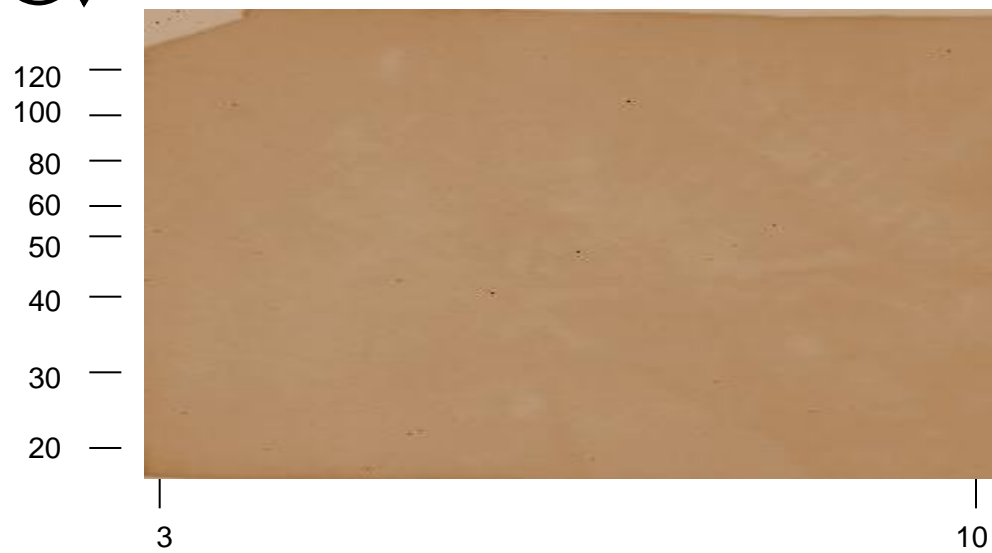

Supplement: 1297-9716-43-72-S1.pdf [file 1297-9716-43-72-S1.pdf]
